# Supplementary material
Source: PubMed Central journal article supplement (PMC4015627)
Supplement: NIHMS560402-supplement-01.pdf [file NIHMS560402-supplement-01.pdf]

**Supplementary Table S1. Distribution of Baseline Characteristics by schedule at baseline**

| Characteristic           | Traditional schedule | Alternative schedule | <i>P</i> value |
|--------------------------|----------------------|----------------------|----------------|
| <i>N</i> =               | 98                   | 24                   |                |
| Male                     | 81 (83%)             | 14 (58%)             | 0.01           |
| Age, years               | 59 (34-82)           | 63.5 (23-77)         | 0.28           |
| Race                     |                      |                      |                |
| Caucasian                | 72 (74%)             | 18 (75%)             | 0.85           |
| African-American         | 6 (6%)               | 2 (8%)               |                |
| Other                    | 20 (20%)             | 4 (17%)              |                |
| ECOG PS                  |                      |                      |                |
| 0                        | 19 (19%)             | 8 (33%)              | 0.34           |
| 1                        | 59 (60%)             | 12 (50%)             |                |
| ≥ 2                      | 20 (21%)             | 4 (17%)              |                |
| Nephrectomy              | 56 (57%)             | 10 (42%)             | 0.25           |
| MSKCC                    |                      |                      |                |
| Good                     | 4 (4%)               | 1 (4%)               | 0.40           |
| Intermediate             | 46 (47%)             | 8 (33%)              |                |
| Poor                     | 48 (49%)             | 15 (63%)             |                |
| Heng Criteria            |                      |                      |                |
| Favorable                | 10 (10%)             | 0 (0%)               | 0.21           |
| Intermediate             | 60 (61%)             | 18 (75%)             |                |
| Poor                     | 28 (29%)             | 6 (25%)              |                |
| Number of metastases     |                      |                      |                |
| Lungs                    | 73 (74%)             | 15 (63%)             | 0.30           |
| Bone                     | 25 (26%)             | 14 (58%)             | 0.00           |
| Liver                    | 19 (19%)             | 6 (25%)              | 0.58           |
| Number of metastases     |                      |                      |                |
| 1                        | 33 (34%)             | 3 (13%)              | 0.08           |
| 2                        | 37 (38%)             | 10 (42%)             |                |
| ≥ 3                      | 28 (29%)             | 11 (46%)             |                |
| Laboratory abnormalities |                      |                      |                |
| Hgb < LLN                | 74 (76%)             | 21 (88%)             | 1.00           |
| ANC > 7.3 K/uL           | 31 (32%)             | 4 (17%)              | 0.00           |
| Cor. Ca > 10 mg/dL       | 20 (20%)             | 7 (29%)              | 0.72           |
| PLT > 440 K/uL           | 16 (16%)             | 10 (42%)             | 0.40           |

ECOG PS = Eastern Cooperative Oncology Group performance status; MSKCC = Memorial

Sloan-Kettering Cancer Center; Hgb = hemoglobin; LLN = lower limit of normal; ANC =

absolute neutrophil count; Cor. Ca = corrected calcium; PLT = platelets

**Supplementary Table S2. Multivariable Cox proportional hazards model for progression-free survival at baseline (Total patients = 122, Progression = 106)**

| Variable                          | Hazard Ratio | 95% CI      | <i>P</i> value |
|-----------------------------------|--------------|-------------|----------------|
| LDH $\geq$ 927 (vs. <927)         | 2.54         | 1.28 – 5.05 | 0.008          |
| Albumin $\leq$ 4 (vs. >4)         | 1.73         | 1.08 – 2.78 | 0.02           |
| Heng Intermediate vs. Favorable   | 1.18         | 0.53 – 2.63 | 0.68           |
| Heng Poor vs. Favorable           | 1.59         | 0.66 – 3.85 | 0.30           |
| AS at treatment baseline (vs. TS) | 0.71         | 0.42 – 1.21 | 0.21           |

LDH = lactate dehydrogenase; AS = alternative schedule; TS = traditional schedule

**Supplementary Table S3. Multivariable Cox proportional hazards model for progression-free survival for patients treated beyond the median time to schedule change (5.6 mo)**

**(Total patients = 122, Progression = 99)**

| Variable                                          | Hazard Ratio | 95% CI      | <i>P</i> value |
|---------------------------------------------------|--------------|-------------|----------------|
| Albumin $\leq$ 4 (vs. $>$ 4)                      | 1.43         | 0.94 – 2.17 | 0.06           |
| ECOG PS = 1 (vs. 0)                               | 1.49         | 0.93 – 2.40 | 0.09           |
| ECOG PS $\geq$ 2 (vs. 0)                          | 3.24         | 1.40 – 4.00 | 0.003          |
| Heng Intermediate vs. Favorable                   | 1.13         | 0.66 – 2.02 | 0.60           |
| Heng Poor vs. Favorable                           | 1.60         | 0.68 – 3.59 | 0.02           |
| AS beyond median time to schedule change (vs. TS) | 0.59         | 0.38 – 0.91 | 0.002          |

ECOG PS = Eastern Cooperative Oncology Group performance status; AS = alternative schedule; TS = traditional schedule

**Supplementary Table S4: Univariate Cox proportional hazards models for overall survival**

**(Total patients=185, Deaths=128)**

| Variable                                 | Hazard Ratio | 95% CI       | <i>P</i> value |
|------------------------------------------|--------------|--------------|----------------|
| Time to systemic therapy < 1 year        | 1.84         | 1.27 – 2.67  | 0.001          |
| Prior Nephrectomy                        | 0.55         | 0.39 – 0.79  | 0.001          |
| AS at treatment discontinuation (vs. TS) | 0.48         | 0.34 – 0.69  | 0.0001         |
| AS at treatment baseline (vs. TS)*       | 0.61         | 0.34 – 1.08  | 0.09           |
| LDH > ULN                                | 5.45         | 2.95 – 10.05 | <0.0001        |
| Albumin < LLN                            | 2.28         | 1.58 – 3.29  | <0.0001        |
| Corrected calcium                        | 1.23         | 1.03 – 1.47  | 0.02           |
| Hemoglobin                               | 0.84         | 0.78 – 0.91  | <0.0001        |
| ECOG PS = 1 (vs.0)                       | 2.11         | 1.29 – 3.46  | 0.03           |
| ECOG PS = 2,3 (vs.0)                     | 4.83         | 2.71 – 8.58  | <0.0001        |
| MSKCC Good vs. Poor                      | 0.04         | 0.005 – 0.27 | 0.001          |
| MSKCC Intermediate vs. Poor              | 0.40         | 0.28 – 0.58  | <0.0001        |
| Heng Intermediate Vs Favorable           | 1.88         | 0.97 – 3.64  | 0.06           |
| Heng Poor vs. Favorable                  | 5.52         | 2.74 – 11.12 | <0.0001        |
| Metastases = 2 (vs.1)                    | 1.47         | 0.96 – 2.28  | 0.08           |
| Metastases ≥ 3 (vs.1)                    | 2.15         | 1.35 – 3.42  | 0.001          |

\*63 patients were excluded in this model as they did not start with an alternative schedule (Total patients=122, Deaths=92)

AS = alternative schedule; TS = traditional schedule; LDH = lactate dehydrogenase; ULN = upper limit of normal; LLN = lower limit of normal; ECOG PS = Eastern Cooperative Oncology Group performance status; MSKCC = Memorial Sloan-Kettering Cancer Center

**Supplementary Table S5. Multivariable Cox proportional hazards model for overall survival at baseline (Total patients=122, Deaths=92)**

| Variable                          | Hazard Ratio | 95% CI      | <i>P</i> value |
|-----------------------------------|--------------|-------------|----------------|
| LDH $\geq$ 927 (vs. <927)         | 2.99         | 1.46 – 6.14 | 0.003          |
| Albumin $\leq$ 4 (vs. >4)         | 2.10         | 1.26 – 3.50 | 0.005          |
| ECOG PS = 1 (vs. 0)               | 1.99         | 1.09 – 3.64 | 0.03           |
| ECOG PS $\geq$ 2 (vs. 0)          | 2.79         | 1.25 – 6.21 | 0.01           |
| Heng Intermediate vs. Favorable   | 2.18         | 0.77 – 6.17 | 0.14           |
| Heng Poor vs. Favorable           | 2.73         | 0.85 – 8.75 | 0.09           |
| AS at treatment baseline (vs. TS) | 0.72         | 0.40 – 1.30 | 0.27           |

LDH = lactate dehydrogenase; ECOG PS = Eastern Cooperative Oncology Group performance status; AS = alternative schedule; TS = traditional schedule

**Supplementary Table S6. Multivariable Cox proportional hazards model for overall survival in patients treated beyond the median time to schedule change (5.6 mo) (Total patients = 122, Deaths = 72)**

| Variable                                          | Hazard Ratio | 95% CI      | <i>P</i> value |
|---------------------------------------------------|--------------|-------------|----------------|
| Albumin $\leq 4$ (vs. $>4$ )                      | 1.60         | 0.99 – 2.60 | 0.05           |
| ECOG PS = 1 (vs. 0)                               | 1.62         | 1.03 – 3.44 | 0.03           |
| ECOG PS $\geq 2$ (vs. 0)                          | 3.40         | 1.55 – 7.46 | 0.002          |
| Heng Intermediate vs. Favorable                   | 0.93         | 0.45 – 1.93 | 0.08           |
| Heng Poor vs. Favorable                           | 1.94         | 0.80 – 4.68 | 0.01           |
| AS beyond median time to schedule change (vs. TS) | 0.93         | 0.56 – 1.53 | 0.76           |

ECOG PS = Eastern Cooperative Oncology Group; AS = alternative schedule; TS = traditional schedule

**Supplementary Figure S1A. Kaplan-Meier estimates for progression-free survival by sunitinib dosing schedule at baseline ( $N = 122$ ).**

**Supplementary Figure S1B. Kaplan-Meier estimates for overall survival by sunitinib dosing schedule at baseline ( $N = 122$ ).**



**Supplementary Figure S2A. Kaplan-Meier estimates for progression-free survival by sunitinib dosing schedule in patients treated beyond median time to schedule change ( $N=122$ ).**

**Supplementary Figure S2B. Kaplan-Meier estimates for overall survival by sunitinib dosing schedule in patients treated beyond median time to schedule change ( $N=122$ ).**
