# Supplementary material
Source: PubMed Central journal article supplement (PMC4015627)

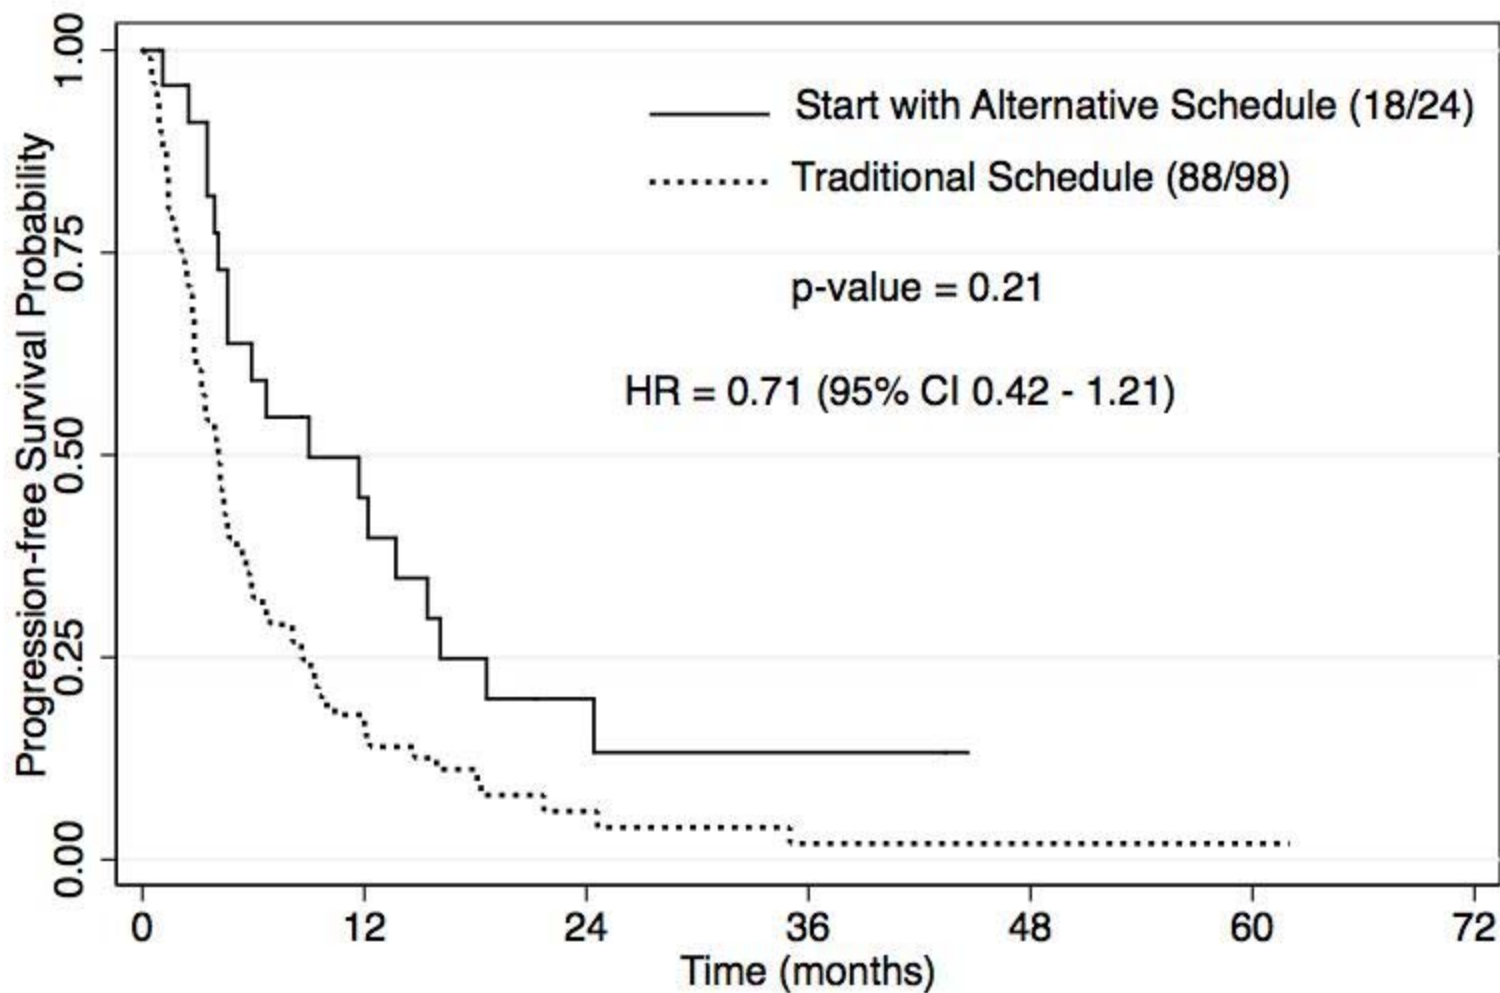

Supplement: NIHMS560402-supplement-02.pdf [file NIHMS560402-supplement-02.pdf]

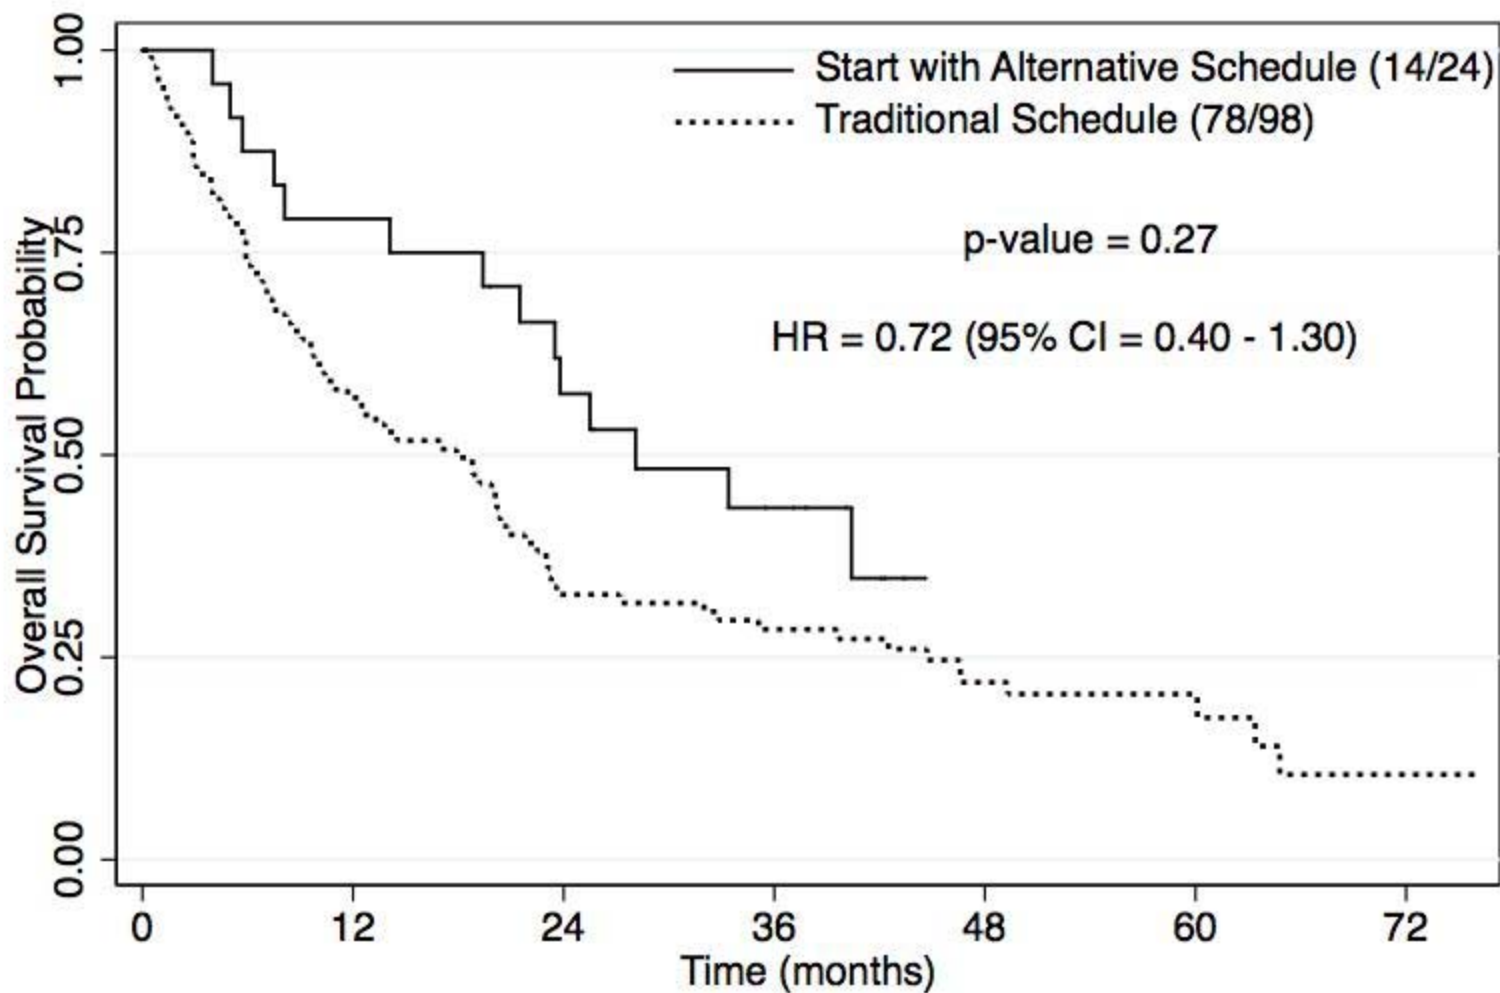

Supplement: NIHMS560402-supplement-03.pdf [file NIHMS560402-supplement-03.pdf]



Supplement: NIHMS560402-supplement-04.pdf [file NIHMS560402-supplement-04.pdf]

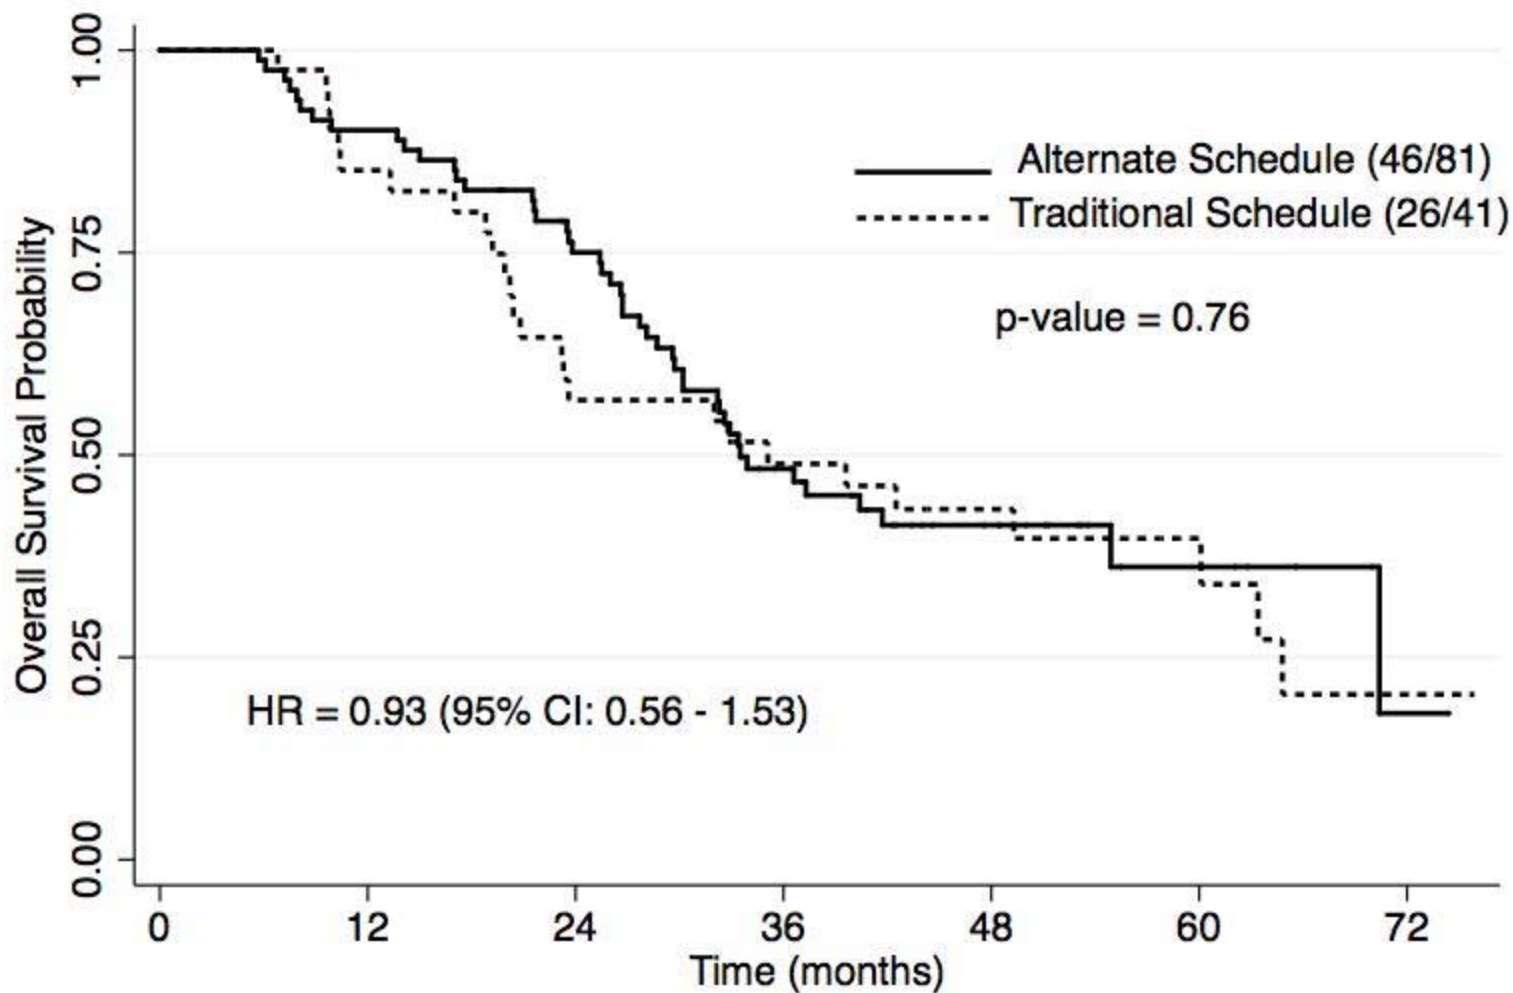

Supplement: NIHMS560402-supplement-05.pdf [file NIHMS560402-supplement-05.pdf]
